# Supplementary material
Source: PubMed Central journal article supplement (PMC1360723)
Supplement: bj3930705add.pdf [file bj3930705add.pdf]

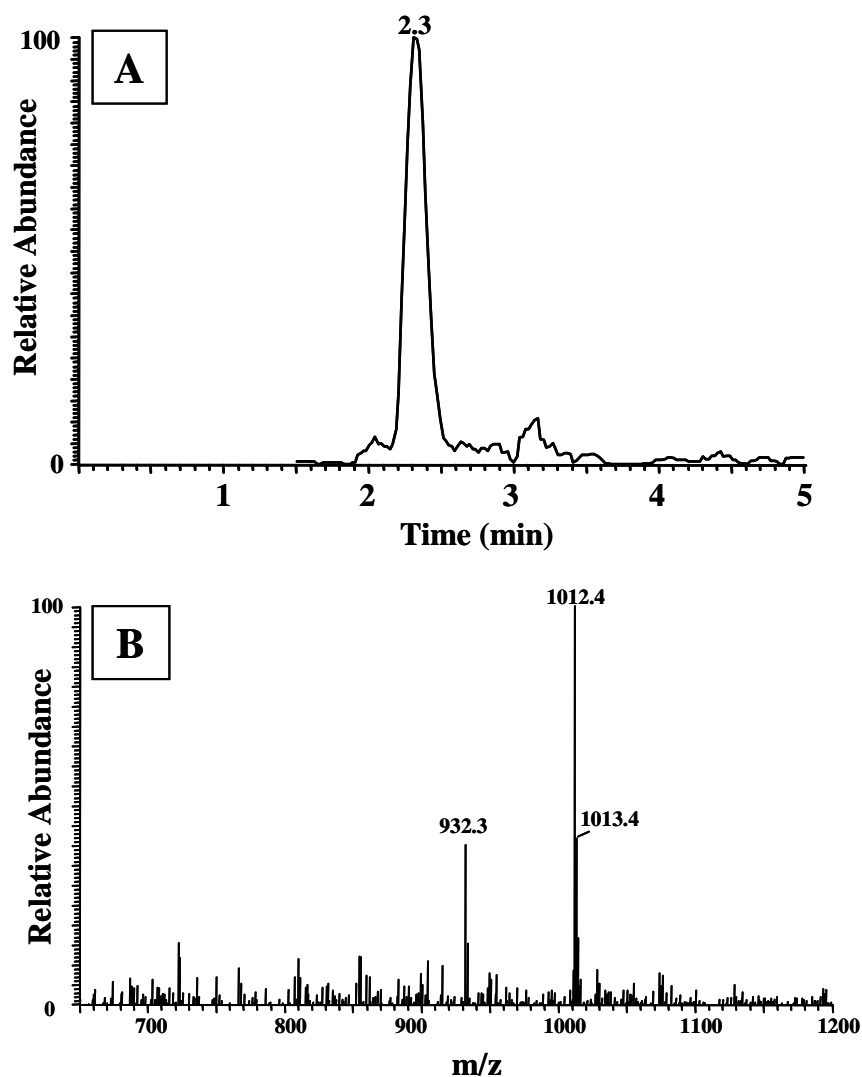

**Figure 1S. LC-ESI-MS analysis of the HPLC-generated fraction I from the corpora cardiaca of *T. fascicularis***

(A) The total ion chromatogram is shown. Gradient elution was from 28 to 50 % B (solvent A: 0.04 % TFA in water; solvent B: 0.04 % TFA in acetonitrile) within 8 min on a RP-C8 Symmetry column (150 x 1 mm ID) with a flow rate of 50  $\mu\text{l min}^{-1}$ .

(B) The full scan ESI mass spectrum of the peak with the retention time of 2.3 min in (A) is shown, depicting  $\text{MH}^+$  at  $m/z$  1012.4.

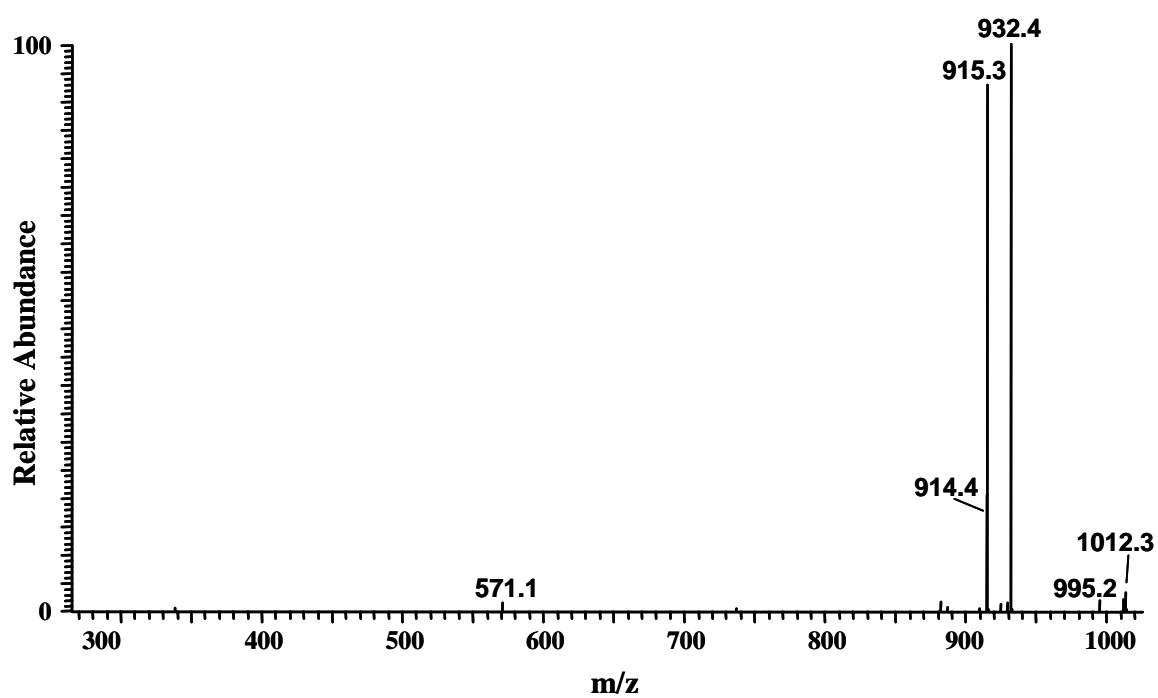

**Figure 2S.** The CID ESI-MS<sup>2</sup> spectrum of the ion MH<sup>+</sup> ( $m/z = 1012.4$ )

The inset shows the sequence of the assigned peptide, denoted Trifa-CC, together with the theoretical calculated masses for these diagnostic ions, which were observed in the MS<sup>N</sup> mass spectra.
